# Supplementary material for: Modelling carbofuran biotransformation byNovosphingobiumsp. KN65.2 in the presence of coincidental carbon and indigenous microbes
Source: Royal Society of Chemistry journal article supplement (doi:10.1039/c8ew00929e), 2019-01-01
Supplement: c8ew00929e1.pdf [file c8ew00929e1.pdf]

# **Modelling carbofuran biotransformation by *Novosphingobium* sp. KN65.2 in the presence of coincidental carbon and indigenous microbes**

*Li Liu<sup>1,2†</sup>, Damian E. Helbling<sup>3,4\*†</sup>, Hans-Peter E. Kohler<sup>3</sup>, Barth F. Smets<sup>1\*</sup>*

<sup>1</sup>Department of Environmental Engineering, Technical, University of Denmark, Bygningstorvet  
115, 2800 Kgs. Lyngby, Denmark;

<sup>2</sup>School of Chemistry, Beihang University, Beijing 100191, P. R. China;

<sup>3</sup>Eawag, Swiss Federal Institute of Aquatic Science and Technology, Department of  
Environmental Microbiology, Überlandstrasse 133, 8600 Dübendorf, Switzerland;

<sup>4</sup>School of Civil and Environmental Engineering, Cornell University, Ithaca, NY, USA.

**\*Corresponding authors:**

[bfsm@env.dtu.dk](mailto:bfsm@env.dtu.dk), phone: +45 45 25 22 30, fax: +45 45 93 28 50

[damian.helbling@cornell.edu](mailto:damian.helbling@cornell.edu), phone: +1 607 255 5146, fax: +1 607 255 9004

**†These authors contributed equally to this work**

# of pages: 5

# of tables: 2

# of figures: 2

1 **TABLE S1.** Matrix notation of the model framework.

|              |                                     | V1                    | V2                       | V3                           | V4           | V5       | Kinetics Rate Expression                                                                  |
|--------------|-------------------------------------|-----------------------|--------------------------|------------------------------|--------------|----------|-------------------------------------------------------------------------------------------|
|              |                                     | $S_{TP}$              | $S_{AOC,X}$              | $S_{AOC,other}$              | $X_{KN65.2}$ | $X_{BC}$ |                                                                                           |
| $X_{KN65.2}$ |                                     |                       |                          |                              |              |          |                                                                                           |
| P1           | Growth $X_{KN65.2}$ on $S_{TP}$     | $-\frac{1}{Y_{TP,X}}$ |                          |                              | 1            |          | $\mu_{XB,X,TP,max} \frac{S_{TP} X_{KN65.2}}{S_{TP} + K_{TP,X}}$                           |
| P2           | Growth $X_{KN65.2}$ on $S_{AOC, Z}$ |                       | $-\frac{1}{Y_{AOC,X}}$   |                              | 1            |          | $\mu_{XB,X,AOC,max} \frac{S_{AOC,X} X_{KN65.2}}{S_{AOC,X} + K_{AOC,X}}$                   |
| P3           | Decay of $X_{KN65.2}$               |                       |                          |                              | -1           |          | $b_X X_{KN65.2}$                                                                          |
| $X_{BC}$     |                                     |                       |                          |                              |              |          |                                                                                           |
| P4           | Growth $X_{BC}$ on $S_{AOC,X}$      |                       | $-\frac{1}{Y_{AOCX,BC}}$ |                              |              | 1        | $\mu_{XB,BC,AOCx,max} \frac{S_{AOC,X} X_{BC}}{S_{AOC,X} + K_{AOC,X,BC}}$                  |
| P5           | Growth $X_{BC}$ on $S_{AOC,other}$  |                       |                          | $-\frac{1}{Y_{AOCother,BC}}$ |              | 1        | $\mu_{XB,BC,AOC other,max} \frac{S_{AOC,other} X_{BC}}{S_{AOC,other} + K_{AOC,other,BC}}$ |
| P6           | Decay of $X_{BC}$                   |                       |                          |                              |              | -1       | $b_{BC} X_{BC}$                                                                           |

2

3 **TABLE S2.** Model parameters calculated from batch experiments in the absence of carbofuran supplements.

| <i>Strain</i>                                     | <b>KN65 (<math>X_{KN65}</math>)</b> |                         |                         |                         |                         | <b>Natural community (<math>X_{BC}</math>)</b> |                         |                         |                         |
|---------------------------------------------------|-------------------------------------|-------------------------|-------------------------|-------------------------|-------------------------|------------------------------------------------|-------------------------|-------------------------|-------------------------|
| <b>Substrate</b>                                  | <b>Carbofuran<sup>1</sup></b>       | <b>AOC<sub>GW</sub></b> | <b>AOC<sub>BF</sub></b> | <b>AOC<sub>SS</sub></b> | <b>AOC<sub>SP</sub></b> | <b>AOC<sub>GW</sub></b>                        | <b>AOC<sub>BF</sub></b> | <b>AOC<sub>SS</sub></b> | <b>AOC<sub>SP</sub></b> |
| $\mu_{max}$<br>[day <sup>-1</sup> ]               | 7.8                                 | 0.106                   | 0.647                   | 7.78                    | 15.18                   | 10.0                                           | 10.11                   | 16.78                   | 6.11                    |
| $K_s$<br>[mg L <sup>-1</sup> ]                    | 1.5                                 | 0.0001                  | $1.4 \times 10^{-4}$    | 0.63                    | 1.92                    | 4.35                                           | 1.10                    | 2.64                    | 0.0003                  |
| $Y_{CS}$<br>[Cells (mg substrate) <sup>-1</sup> ] | $3.12 \times 10^9$                  | $1.0 \times 10^9$       | $1.0 \times 10^9$       | $1.0 \times 10^9$       | $1.0 \times 10^9$       | $1.0 \times 10^9$                              | $1.0 \times 10^9$       | $1.0 \times 10^9$       | $1.0 \times 10^9$       |

4 <sup>1</sup>Data from previous publication: Helbling, D. E.; Hammes, F.; Egli, T.; Kohler, H. P. E., Kinetics and Yields of Pesticide Biodegradation at Low  
5 Substrate Concentrations and under Conditions Restricting Assimilable Organic Carbon. *Appl Environ Microb* 2014, 80, (4), 1306-1313.

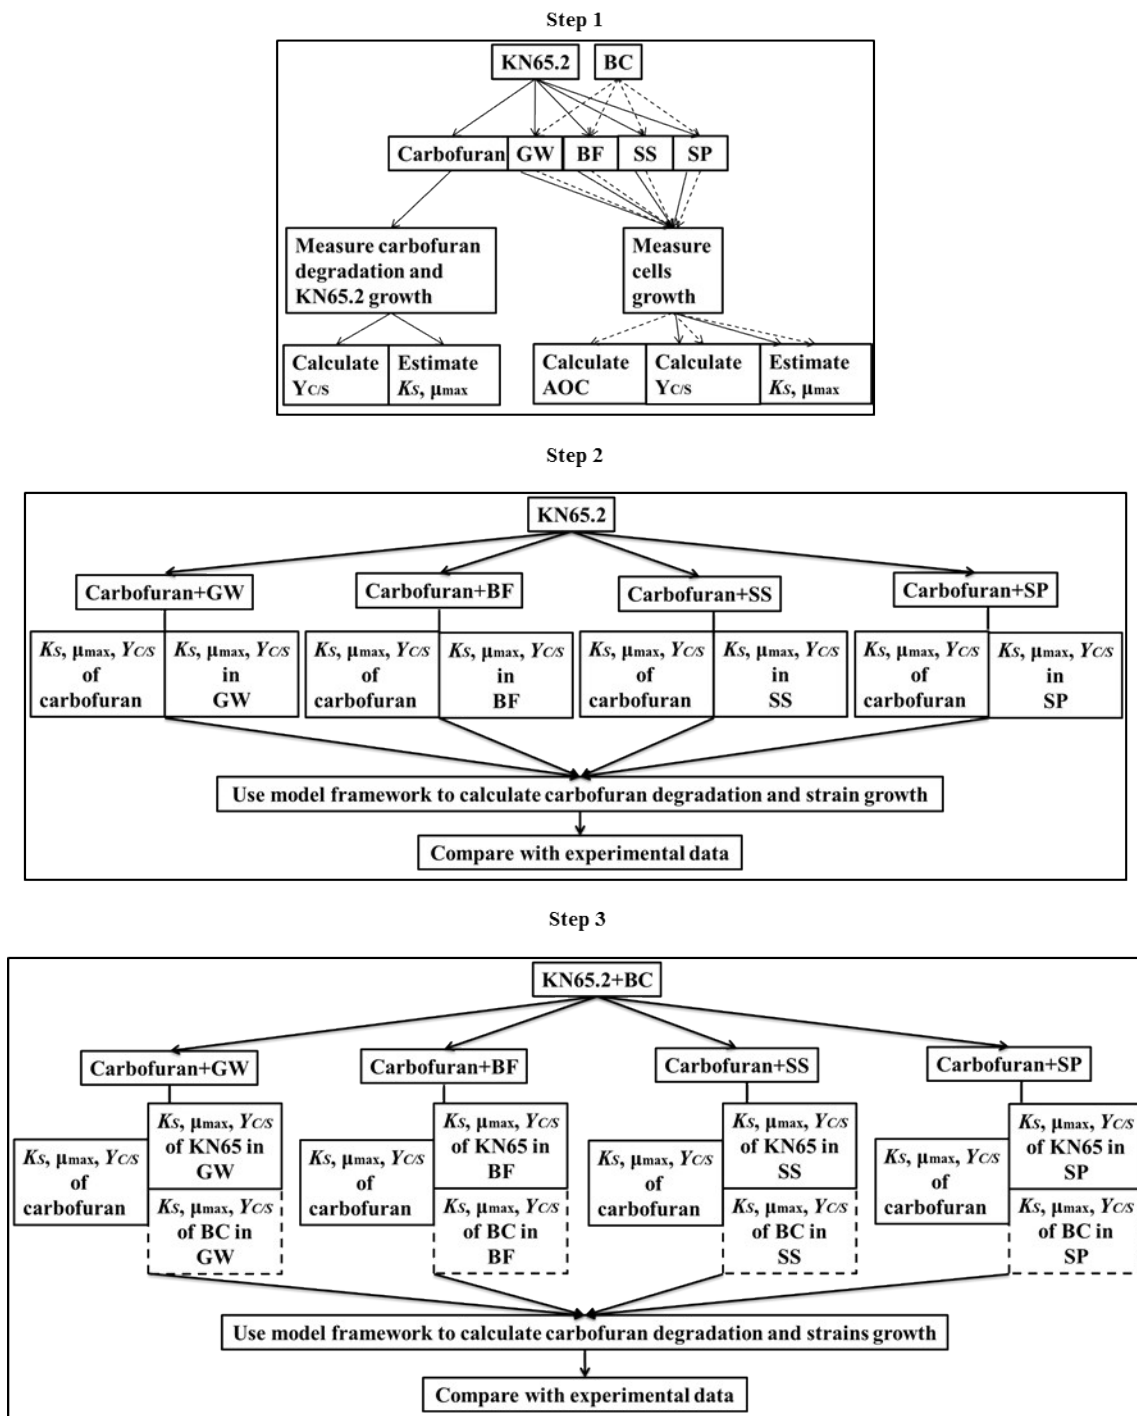

**FIGURE S1.** General procedure for prediction of carbofuran degradation by KN65.2 in water samples by the proposed model framework

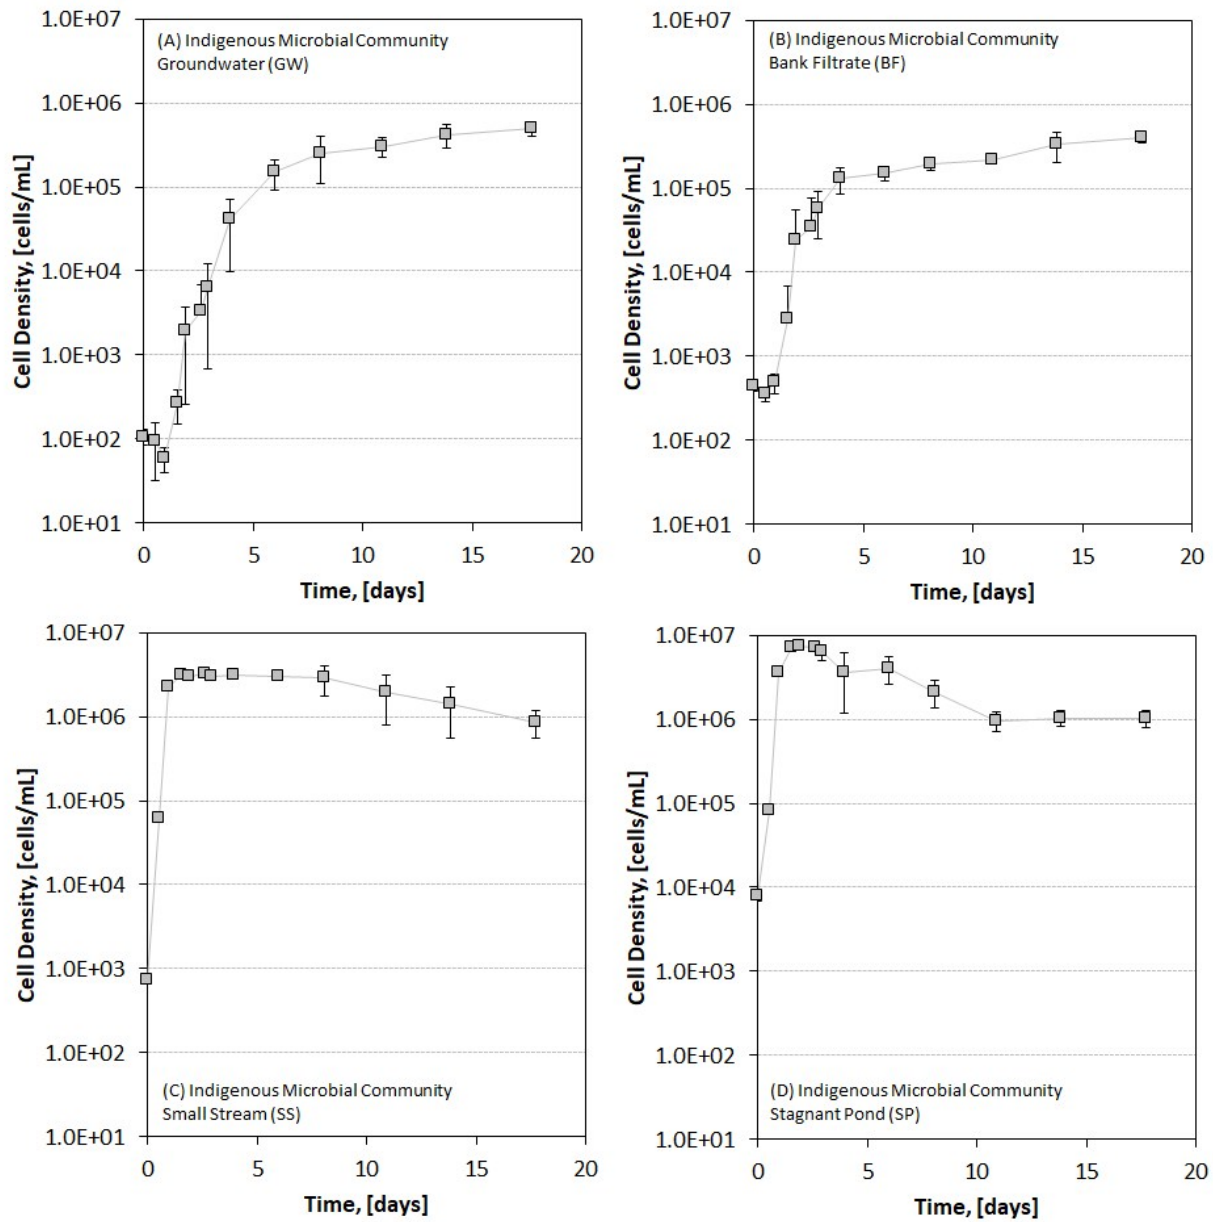

**Figure S2:** Growth of the indigenous microbial community on AOC in (A) groundwater, (B) bank filtrate, (C) a shallow stream, and (D) a stagnant pond.
